**Genome-wide functional analysis of hot pepper immune receptors reveals an autonomous NLR cluster in seed plants**

**Authors:** Hye-Young Lee<sup>a</sup>, Hyunggon Mang<sup>a</sup>, Eun-Hye Choi<sup>a</sup>, Ye-Eun Seo<sup>a</sup>, Myung-Shin Kim<sup>a</sup>, Soohyun Oh<sup>a</sup>, Saet-Byul Kim<sup>a</sup>, and Doil Choi<sup>a,b</sup>

**Author affiliation:** <sup>a</sup>Plant Immunity Research Center, Seoul National University, Seoul, 08826, Republic of Korea,

<sup>b</sup>Plant Genomics and Breeding Institute and Department of Plant Science, Seoul National University, Seoul, 08826, Republic of Korea

**Corresponding Author:** Doil Choi, [doil@snu.ac.kr](mailto:doil@snu.ac.kr)

**Keywords:** Plant NLR, Coiled-coil domain, Autoactivity, Singleton NLR, Cell death

1 **Abstract**

2 Plants possess hundreds of intracellular immune receptors encoding nucleotide-binding  
3 domain and leucine-rich repeat (NLR) proteins. Autoactive NLRs, in some cases a specific  
4 NLR domain, induce plant cell death in the absence of pathogen infection. In this study, we  
5 identified a group of NLRs (G10) carrying autoactive coiled-coil (CC) domains in pepper  
6 (*Capsicum annuum* L. cv. CM334) by genome-wide transient expression analysis. The G10-  
7 CC-mediated cell death mimics hypersensitive response (HR) cell death triggered by  
8 interaction between NLR and effectors derived from pathogens. Sequence alignment and  
9 mutagenesis analyses revealed that the intact  $\alpha$ 1 helix of G10-CCs is critical for both G10-  
10 CC- and R gene-mediated HR cell death. The cell death induced by G10-CCs does not  
11 require known helper NLRs, suggesting G10-NLRs are novel singleton NLRs. We also found  
12 that G10-CCs localize in the plasma membrane as *Arabidopsis* singleton NLR ZAR1.  
13 Extended studies revealed that autoactive G10-CCs are well conserved in other *Solanaceae*  
14 plants, including tomato, potato, and tobacco, as well as a monocot plant, rice. Furthermore,  
15 G10-NLR is an ancient form of NLR that present in all tested seed plants (spermatophytes).  
16 Our studies not only uncover the autonomous NLR cluster in plants but also provide powerful  
17 resources for dissecting the underlying molecular mechanism of NLR-mediated cell death in  
18 plants.

1

1

## 1 **Introduction**

2 Plants have evolved multiple immune receptors to activate defense responses against  
3 pathogen attack (1, 2). In plant cells, nucleotide-binding and leucine-rich repeat (NLR)  
4 proteins monitor pathogen invasion via direct or indirect sensing of effectors derived from  
5 pathogens (1). After recognition, activated NLRs undergo a conformational change and then  
6 initiate immune signaling (3, 4). Following NLR-mediated immune activation, a variety of  
7 defense responses is activated in infected tissues, including calcium flux, production of  
8 reactive oxygen species (ROS), activation of mitogen-activated protein kinases, biosynthesis  
9 of/ signaling by plant defense hormones, and upregulation of a subset of defense-related  
10 genes, which is often associated with the hypersensitive response (HR), a type of  
11 programmed cell death (5, 6).

12 Genome-wide analyses revealed that the NLR repertoire is diverse in terms of both quality  
13 and quantity among plant species, forming distinct phylogenetic clusters (7). Although the  
14 considerable effort expended over the last few decades to elucidate the mechanism of NLR-  
15 mediated resistance has enhanced our understanding of NLR classification based on function,  
16 particularly immune signaling, how multiple NLR clades function in plant immune responses  
17 remains largely unknown.

18 Plant NLRs were recently classified into three different categories based on mode of action:  
19 singleton, pair, and network (7). Singleton NLRs function as a single genetic unit regarding  
20 both sensing and signaling (8-10). Singleton NLRs have the potential to confer resistance  
21 when expressed in heterologous plants, even in taxonomically distant plants, as no other host  
22 factors are required for their full activity (11). In addition, most singleton NLRs possess a  
23 signaling domain that induces visibly notable cell death in heterologous plants. Paired NLRs  
24 function in pairs in which one serves as a ‘sensor’ to detect pathogens while the other  
25 functions as an immune signaling ‘executor’ (12). Ectopic expression of executor NLRs  
26 results in visible cell death without its cognate effector, which is referred to as autoactivity.  
27 The autoactivity of an executor NLR is inhibited by co-expression of paired sensor NLRs,  
28 indicating that sensor NLRs function as negative regulators of executor NLRs in the absence  
29 of pathogen infection (13, 14). Sensor NLRs in pairs have an additional integrated domain  
30 that is unusual and functions in recognizing effector proteins; this domain then relieves the  
31 regulation of the executor NLR, resulting in activation of immune responses. The typical  
32 NLR pairs are RESISTANCE TO *RALSTONIA SOLANACEARUM* 1 (RRS1)/RESISTANCE  
33 TO *PSEUDOMONAS SYRINGAE* 4 (RPS4) in *Arabidopsis thaliana* and RESISTANCE  
34 GENE ANALOG 5 (RGA5)/RGA4 in rice (*Oryza sativa*). These genes are genetically linked

35 and oriented head-to-head so that they may share a promoter for simultaneous regulation of  
36 transcription. Although *in silico* analyses revealed that NLRs with integrated domains are  
37 common in higher plants, functional NLR pairs have been discovered in only a few plant  
38 species (15). A more complex NLR model was reported as an ‘NLR network’, primarily in  
39 Solanaceous plants. Helper NLRs, known as NLR-REQUIRED FOR CELL DEATH (NRC),  
40 are associated with phylogenetically linked sensor NLRs and exhibit functional redundancy  
41 for conferring resistance to a diverse array of pathogens (16).

42 NLR proteins are generally composed of three major domains: a variable N-terminus, a  
43 central nucleotide-binding (NB-ARC) domain, and a C-terminal leucine-rich repeat (LRR)  
44 domain. In general, NLR genes are divided into two major groups based on the N-terminal  
45 domain (NTD) (17, 18). One group contains the Toll/interleukin-1 receptor (TIR) domain at  
46 the N-terminus, referred as a TIR-type NLR (TNL), whereas the other possesses an NTD  
47 with a coiled-coil (CC) structure, referred to as a CNL-type NLR (CNL) (17). One group of  
48 CNLs carrying N-terminal CC domains resembling *Arabidopsis* resistance protein RPW8 was  
49 considered to represent a distinct subclass, RPW8-type CNLs (RNL), based on their function  
50 in the downstream signaling (19-21). RNLs are highly conserved in plant species, and they  
51 are necessary for the function of other NLRs (21). One particular RNL gene, N  
52 REQUIREMENT GENE 1 (NRG1), is specific to TNL-mediated immunity and partially  
53 contributes to the signaling of some CNLs (22). Other RNLs, known as ADR1s, also  
54 associate with various TNLs and function in CNL signaling (20).

55 Structural analyses of NLR proteins have revealed that the NTD plays multiple regulatory  
56 roles. In the case of several NLRs, the NTD interacts with host target proteins manipulated by  
57 effector proteins (23-26). Interactions between homotypic NTDs contribute to the formation  
58 of higher-order complexes of NLRs upon activation (27-29). Moreover, the NTD of NLRs is  
59 also involved in the transduction of cell death signals. Overexpression of the N-terminal  
60 region of some NLRs is sufficient to trigger cell death without cognate effector proteins (19-  
61 21, 28-31). However, how CNLs are activated and trigger cell death remains unclear.

62 Recent reports described the reconstitution of inactive and active complexes of an  
63 *Arabidopsis* CNL, HOPZ-ACTIVATED RESISTANCE 1 (ZAR1), with receptor-like  
64 cytoplasmic kinases (RLCKs) using structural and biochemical approaches (4, 32). Cryo-  
65 electron microscopy structural analyses demonstrated that activated ZAR1 forms a wheel-like  
66 pentamer resistosome and then undergoes a conformational change that exposes a funnel-  
67 shaped structure formed by the N-terminal  $\alpha$ 1 helix of the CC domain. These results suggest  
68 that the exposed  $\alpha$ 1 helix of the ZAR1 resistosome mediates cell death by translocating into

69 and perturbing the integrity of the plasma membrane (PM) (32). However, whether the ZAR1  
70 model sufficiently explains CC-induced cell death remains unclear and requires further  
71 research.

72 Solanaceous plants belong to a large family consisting of over 3,000 species, including a  
73 number of economically important crops, such as potato (*Solanum tuberosum*), tomato  
74 (*Solanum lycopersicum*), and pepper (*Capsicum annuum*) (33). Previous comparative  
75 analyses of NLR genes across Solanaceae genomes revealed that the NLR gene family can be  
76 classified into one TNL and 13 CNL subgroups (34). Pepper CNL-Group 10 (G10) contains  
77 34 genes, including the known disease-resistance (R) genes *Pvr4* and *Tsw*, the products of  
78 which confer resistance to potyviruses such as *Potato virus Y* and *Tomato spotted wilt virus*  
79 via recognition of a viral effector, respectively (35, 36). Structural domain analyses revealed  
80 that the CC domain of *Pvr4* is sufficient to activate cell death in the absence of the viral  
81 effector Nib (37).

82 In this study, we conducted a genome-wide screening in *Nicotiana benthamiana* and report  
83 here that the CC domains of G10-NLRs (hereafter G10-CCs) in pepper specifically induce  
84 HR-like cell death. Autoactive G10-NLRs and G10-CC-mediated cell death were associated  
85 with immune responses. G10-CC domains were found to localize in the PM, where the  $\alpha 1$   
86 helix of these domains plays a critical role in mediating cell death. Cell death induced by  
87 autoactive G10-NLRs and G10-CCs was not compromised in *NRC*- or *NRG1/ADRI*-silenced  
88 plants, suggesting that helper NLRs are not required for signaling associated with G10-NLR-  
89 mediated cell death. Surprisingly, G10-NLRs were found to be well conserved in seed plants.  
90 G10-CCs in other Solanaceae plants, such as tomato, potato, and tobacco, as well as a  
91 monocot plant, rice, induced cell death in *N. benthamiana*. We propose that G10-NLRs  
92 represent a novel singleton NLR cluster and that G10-CCs could serve as powerful resources  
93 for elucidating the underlying molecular mechanism of NLR-induced plant cell death.

94

## 95 **Results**

### 96 **The CC domains of pepper G10-NLRs induce cell death in *N. benthamiana***

97 In a previous study, intact pepper NLRs were identified and assigned into 14 groups,  
98 consisting of 1 TNL and 13 CNLs (34). To identify autoactive NLRs on a genome-wide scale,  
99 genomic fragments of 436 intact pepper NLRs were cloned into the binary vector  
100 pCAMBIA2300-LIC (35, 36). The sequences of all inserts were confirmed by DNA  
101 sequencing analysis (Dataset S1), and the constructs were transiently expressed in *N.*  
102 *benthamiana* leaves via agroinfiltration. Among the 436 tested NLRs, only 15 (3.4%)

103 triggered cell death (Table 1). These NLRs were randomly distributed into six groups: TNL,  
104 CNL-G5, CNL-G9, CNL-G10, CNL-G11, and CNL-NG. To determine whether these genes  
105 function as executor NLRs with their paired sensor NLRs, we examined the upstream  
106 flanking genes of the autoactive NLRs using pepper chromosome pseudomolecules, as  
107 known NLR pairs are genetically linked in a head-to-head orientation (38, 39). Although 9 of  
108 15 autoactive NLRs had an NLR-type gene in the upstream flanking region, none were  
109 arranged in a head-to-head orientation (Table S1). Furthermore, the sequences of these  
110 upstream NLR genes did not encode an integrated decoy domain, which is a typical feature of  
111 sensors of paired NLRs. These results suggest that the conventional paired NLR immune  
112 receptors, such as *Arabidopsis* RPS4/RRS1 and rice RGA4/RGA5, probably do not exist in  
113 pepper.

114 Previous studies reported that the N-terminal TIR or CC domains of a specific set of  
115 resistance proteins, mostly potential singleton NLRs, induce cell death when overexpressed  
116 alone in plants (21, 40, 41). These results suggest that NLR proteins normally trigger immune  
117 signaling via the NTD. To identify NLRs carrying an autoactive NTD in pepper, a  
118 representative subset of NTDs, including those of autoactive NLRs, were transiently  
119 overexpressed in *N. benthamiana* in the same manner as the full-length NLR. The NTDs for  
120 each group were randomly chosen and represented more than 15% of all assigned NLRs from  
121 a subclade in a phylogenetic tree analysis (Table 1, Dataset S2). The NTD fragments were  
122 determined from the N-terminus up to the predicted P-loop in the NB-ARC domain. Of the  
123 15 autoactive full-length NLRs examined, only 2 TIR domains and 3 CC domains from  
124 autoactive TNLs and G10-NLRs, respectively, induced visible cell death when expressed in  
125 *N. benthamiana* (*SI Appendix*, Table S2). Within the CNL-NG group, CC domains from  
126 pepper homologs of NbNRG1 and NbADR1 triggered cell death (*SI Appendix*, Table S2). In  
127 particular, compared with other groups, a significantly higher proportion of the CC domains  
128 of pepper CNL-G10 that were tested (70.8%) triggered cell death (Table 1 and *SI Appendix*,  
129 Fig. S1). G10-NLRs formed a distinct cluster in the phylogenetic tree that included several  
130 cloned functional R genes: *Pvr4* and *Tsw* in pepper and *RPS2* and *RPS5* in *Arabidopsis* (34).  
131 Although G10-NLRs are conventional CNLs, G10 is phylogenetically distinct from other  
132 CNL clades (34). Taken together, these data suggest that G10-NLRs have features specific to  
133 other CNLs and they may play unique a role(s) in plant immunity.

134

135 **CC-induced cell death mimics R gene-mediated HR**

136 We next investigated whether cell death induced by autoactive G10-NLRs or G10-CCs  
137 plays a role in R gene-mediated defense responses against pathogens. An autoactive NLR,  
138 CC309, a non-autoactive NLR, CC10-1, and an autoactive full-length NLR, NLR620, were  
139 examined in this assay. A known G10-NLR gene, *Pvr4*, and its cognate Avr gene, *Nlb*, of  
140 *Pepper mottle virus*, were also included as positive controls for R gene-mediated defense  
141 responses (36). Even though they share high identity (95.5% and 89.9% at the nucleotide and  
142 amino acid levels, respectively), CC309 and CC10-1 exhibited opposing phenotypes (Fig.  
143 1A). Transient overexpression of CC309 and NLR620, but not CC10-1, triggered visible  
144 death in *N. benthamiana*. All proteins were detected in immunoblotting analysis, but the  
145 expression level of CC10-1 was much lower than that of CC309 (Fig. 1B). To exclude the  
146 possibility that the non-functionality of CC10-1 is due to low protein accumulation, green  
147 fluorescent protein (GFP) was fused to CC309 and CC10-1 at the C-terminus. Although  
148 CC309-GFP and CC10-1-GFP accumulated to similar levels, CC10-1-GFP still did not  
149 trigger cell death, indicating that the non-autoactivity of CC10-1 cannot be attributed to low  
150 expression levels (*SI Appendix*, Fig. S2).

151 Two days after agroinfiltration, we assessed hydrogen peroxide (H<sub>2</sub>O<sub>2</sub>) accumulation in the  
152 leaves using 3,3'-diaminobenzidine hydrochloride (DAB) staining. H<sub>2</sub>O<sub>2</sub> production was  
153 observed during cell death mediated by activated *Pvr4* (Fig. 1C). As demonstrated by *Pvr4*,  
154 cells expressing CC309 and NLR620, but not CC10-1, exhibited accumulation of H<sub>2</sub>O<sub>2</sub>.  
155 These results indicate that accumulation of ROS, which is a defense response against  
156 pathogen infection, is accompanied by cell death induced by autoactive G10-NLR and G10-  
157 CC.

158 To verify that ectopic expression of autoactive G10-NLR and G10-CC mimics the  
159 activation of defense-related genes, CC309- and NLR620-mediated accumulation of  
160 transcripts for four defense-related genes was monitored during the cell death process at  
161 various time points after agroinfiltration (Fig. 1D). Overexpression of CC309 and NLR620,  
162 but not CC10-1, resulted in significantly higher transcription of several genes, including the  
163 HR cell death marker gene *Harpin-induced 1 (Hin1)*, a transcription factor for physiological  
164 substrates of mitogen-activated protein kinases, *WRKY8*, a cytochrome P450 involved in  
165 sesquiterpene phytoalexin biosynthesis, *CYP71D20*, and *Pathogenesis-related gene 1 (PRI)*  
166 (42-45). These results indicate that cell death induced by autoactive G10-NLR and G10-CC is  
167 also correlated with the accumulation of defense-related gene transcripts.

168 Although ROS production and upregulation of defense-related genes are typical immune  
169 responses, we cannot exclude the possibility that they also occur as a consequence of cell



170 death. To verify that autoactive G10-NLR and G10-CC indeed trigger defense responses, we  
171 performed a co-expression assay using a *Potato virus X* (PVX) vector encoding GFP (37).  
172 We hypothesized that if autoactive G10-CC- or G10-NLR-mediated cell death is associated  
173 with activation of defense responses, replication of PVX would be suppressed in co-  
174 expressing cells. To avoid the possibility that cell death would affect the replication of PVX,  
175 the GFP signal was monitored before onset of the severe cell death phenotype (*SI Appendix*,  
176 Fig. S3). Compared with the empty vector, Pvr4 with Nl6 significantly reduced the  
177 abundance of PVX:GFP. Moreover, the GFP accumulation was also almost completely  
178 inhibited by expression of CC309 and NLR620 (Fig. 1E, 1F). Taken together, cell death  
179 induced by autoactive G10-NLR and G10-CC functionally mimics R gene-mediated HR cell  
180 death.

181

### 182 **The N-terminal $\alpha$ 1 helix is critical for autoactivity of G10-CCs**

183 We performed an alignment analysis of pepper G10-CCs to identify the conserved motif  
184 necessary for cell death activity. However, no conserved motif was found in any of the G10-  
185 CCs examined (*SI Appendix*, Fig. S4). A phylogenetic analysis based on amino acid  
186 sequences of pepper G10-CCs revealed that they are divided into three subclades, with 100%  
187 bootstrap confidence level (Fig. 2A). In the phylogenetic analysis, we found that most of non-  
188 autoactive G10-CCs (shown by open circle) belong to subclade I (Fig. 2A left panel). It was  
189 recently reported that the N-terminal  $\alpha$ 1 helix of the ZAR1 CC domain is crucial for its cell  
190 death-inducing activity based on a crystal structure model (32). This prompted us to perform  
191 further analysis of the  $\alpha$ 1 helix of subclade I members. Prediction of secondary structures  
192 using JPRED4 (<http://www.compbio.dundee.ac.uk/jpred4>) revealed that non-autoactive G10-  
193 CCs (CC292, CC310, CC368, and CC430) in subclade I have a shorter  $\alpha$ 1 helix than  
194 autoactive G10-CCs (Fig. 2A, right panel), and partial deletion of the  $\alpha$ 1 helix was found in  
195 non-autoactive G10-CCs (Fig. 2B). Although the  $\alpha$ 1 helix of non-autoactive CC474 is of  
196 relatively sufficient length, a deletion was found in the linker region between the  $\alpha$ 1 and  $\alpha$ 2  
197 helices (Fig. 2A right panel and 2B), suggesting that the deletion may disrupt formation of  
198 the structure necessary for activity. Taken together, these results suggest that the cell death-  
199 inducing activity of non-autoactive G10-CCs in subclade I is associated with the deletion in  
200 the  $\alpha$ 1 helix.

201 Interestingly, CC10-1 of subclade III is the only non-autoactive CC domain that has an  $\alpha$ 1  
202 helix without deletion. Sequence alignment with CC309 revealed a difference in the 12-aa N-  
203 terminal region (Fig. 3A, *SI Appendix*, Fig. S4). The N-terminus of the CC domain of NLRs



204 has been reported important for both cell death activity and subcellular localization of the  
205 NLR protein (32, 46). In the case of *Arabidopsis RPS5*, a known resistance gene in G10, N-  
206 terminal acylation-mediated PM localization is essential for cell death activity, although the  
207 RPS5 CC domain also requires the NB-ARC domain to trigger cell death (46). However,  
208 pepper G10-CCs do not contain the predicted S-acylation site in the N-terminus. A  
209 transmembrane region spanning residues 1–30 was predicted by TMHMM Server ver. 2.0  
210 with low probability in CC309, but not CC10-1 (*SI Appendix*, Fig. S5). We hypothesized that  
211 the sequence variation in the  $\alpha 1$  helix between CC309 and CC10-1 has an effect on  
212 subcellular distribution and consequently results in the observed difference in activity. We  
213 examined the subcellular distribution of G10-CCs-GFP in *N. benthamiana* using confocal  
214 microscopy. GFP signals associated with CC309-GFP and CC10-1 were detected at the PM  
215 and colocalized with FM4-64, a fluorescent dye specific for the PM (Fig. 3B). Moreover,  
216 other non-autoactive G10-CCs in subclades I and II also localized at the PM (*SI Appendix*,  
217 Fig. S6). These results suggest that non-autoactivity of G10-CCs is not due to mislocalization  
218 to other cellular compartments.

219 Based on the above observations, we focused on the N-terminus of members of subclade  
220 III and identified a well-conserved ‘TAILSP’ motif in members of subclade III, except for  
221 CC10-1 (*SI Appendix*, Fig. S4). To confirm the autoactivity function of this motif, we  
222 generated CC309 mutants in which 1 to 12 aa or a partial region were substituted with those  
223 of CC10-1 (Fig. 3C) and expressed the mutants in *N. benthamiana*. Substitution of residues  
224 7–12 (mCC309<sup>7-12</sup>), corresponding to the ‘TAILSP’ motif, as well as residues 1–12  
225 (mCC309<sup>1-12</sup>), but not residues 1–6 aa (mCC309<sup>1-6</sup>), abolished cell death-inducing activity  
226 (Fig. 3D). Conversely, mCC10-1<sup>5-10</sup> carrying residues 7–12 of CC309 exhibited slightly  
227 recovered activity, indicating that residues 7–12 of CC309 are critical for autoactivity. To  
228 confirm that the ‘TAILSP’ motif is also critical for R gene-mediated cell death, this motif in  
229 CC<sub>Pvr4</sub> and Pvr4 was mutated to that of CC10-1. Like CC309, mutation of the ‘TAILSP’  
230 motif disrupted the cell death-inducing activity of CC<sub>Pvr4</sub>, even when expressed with its  
231 cognate effector, NIB (Fig. 3E). Immunoblotting analysis revealed comparable expression  
232 levels of these protein fragments (Fig. 3G, 3H). These results suggest that the ‘TAILSP’  
233 motif of the  $\alpha 1$  helix is crucial for autoactivity of G10-CCs and R genes.

234 Next, to identify the amino acids responsible for functionality, site-directed mutagenesis  
235 using synthetic oligonucleotides was performed to exchange each residue in the ‘TAILSP’  
236 motif to an alanine or glutamate. A8, I9, and L10 were substituted with negatively charged  
237 glutamate (E), and T7, S11, and 12P were substituted with alanine (A). The A8E mutation

238 substantially reduced the activity, and the I9E and L10E mutations completely disrupted  
239 function (Fig. 3F), indicating that hydrophobic residues are essential for cell death-inducing  
240 activity. All of the mutant proteins accumulated to similar levels, except for L10E, when  
241 expressed in *N. benthamiana* leaves, indicating that the observed loss-of-function phenotype  
242 was not due to protein destabilization (Fig. 3I). Collectively, our results suggest that  
243 hydrophobic amino acids in the  $\alpha 1$  helix of pepper G10-CC are critical for autoactivity.

244

#### 245 **Four $\alpha$ helices of G10-CC are required for cell death-inducing activity**

246 It was reported that only 29 amino acids of NRC4 are sufficient to induce cell death in *N.*  
247 *benthamiana* (47). In attempting to define the minimal region of G10-CC sufficient for  
248 autoactivity, we found that the G10-CC domain has five  $\alpha$  helices via secondary structure  
249 analysis. We therefore generated N-terminal or C-terminal deletion mutants of CC309 (Fig.  
250 4A). Truncated fragments of CC309 with a deletion of 5 (N1) or 10 (N2) amino acids at the  
251 N-terminus exhibited a diminished cell death-inducing activity (Fig. 4B). C-terminal deletion  
252 mutants C1 and C2, but not C3, induced cell death (Fig. 4B and 4D), suggesting that the four  
253  $\alpha$  helices of G10-CC are necessary and sufficient for triggering cell death. The capacity for  
254 inducing cell death was quantitatively measured based on photosynthetic parameters: the  
255 quantum yield of photochemistry in PSII (Fv/Fm) (Fig. 4D) (48). An immunoblot analysis  
256 was performed to assess accumulation of the FLAG-fused deletion mutants after 24 h of  
257 agroinfiltration. Proteins N1 and N2 accumulated at much lower levels than full-length  
258 CC309, suggesting that the N-terminus plays a role in maintaining protein stability. However,  
259 although C2 accumulated to a lower level than C1, it exhibited the strongest cell death-  
260 inducing activity and lowest Fv/Fm value (Fig. 4B, 4C, and 4D), indicating that protein level  
261 does not affect cell death-inducing activity and the  $\alpha 5$  helix is not essential for autoactivity.  
262 Consistent with previous observations in motif-swap experiments, these results suggest that  
263 the  $\alpha 1$  helix is critical for the cell death-inducing activity of G10-CC and at least four  $\alpha$   
264 helices are required for autoactivity.

265

#### 266 **Cell death mediated by G10-CCs is independent of helper NLRs**

267 Recent studies revealed that NLR-mediated immunity involves a complex network and  
268 many NLRs require helper NLRs to exert activity in the immune response (16, 22). We  
269 therefore tested the dependence of G10-NLR- and G10-CC-mediated cell death activity on  
270 known helper NLRs. Virus-induced gene silencing (VIGS) was performed to simultaneously  
271 co-silence the RNL-type helpers *NbNRG1* and *NbADR1* and the triple NRC-type helpers

272 NRC2, 3, and 4. Autoactive G10-CCs were expressed in silenced plants by agroinfiltration  
273 (Fig. 5A). Silencing efficiency was estimated by qRT-PCR analysis of the transcript levels of  
274 each gene at 3 weeks after VIGS (Fig. 5C). One of the *NbNRC*-dependent *Phytophthora*  
275 *infestans* resistance genes, *R8*, and its cognate effector, *Avr8*, were used as controls (16). In  
276 NRC-silenced plants, cell death mediated by *R8/Avr8* was compromised, whereas cell death  
277 mediated by autoactive CC309, NLR620 and Pvr4/NlB was not (Fig. 5A). Cell death induced  
278 by G10-CC and G10-NLR was also not compromised in *NRG1*- and *ADRI*-silenced plants  
279 (Fig. 5A and 5B). These results indicate that G10-CCs and G10-NLR trigger cell death in a  
280 helper-independent manner.

281

### 282 **G10-NLRs are conserved in seed plants, and G10-CCs of other plant species induce cell** 283 **death**

284 A phylogenetic analysis was conducted on a larger scale to more completely elucidate the  
285 divergence and evolution history of NLRs in seed plants. Because it is the only conserved  
286 domain of NLR proteins suitable for sequence alignment, the NB-ARC domain of a total  
287 2,419 NLRs from ten representative plant species, including four Solanaceous species  
288 (pepper, tomato, potato, and tobacco [*Nicotiana tabacum*]); a Brassicaceae plant (*A. thaliana*);  
289 a monocot, Poaceae rice (*Oryza sativa*); a Piperaceae black pepper (*Piper nigrum*), a basal  
290 angiosperm (*Amborella trichopoda*); a gymnosperm, Norway spruce (*Picea abies*) and an  
291 oldest lineages of vascular plants Selaginella (*Selaginella moellendorffii*) were subjected to  
292 phylogenetic analysis. The groups were assigned based on a previous study of the  
293 classification of Solanaceae NLRs. Most of the NLRs were included in assigned groups,  
294 except for three NLRs of *Selaginella moellendorffii*. G10 formed a monophyletic clade with a  
295 high bootstrap value of 91% and was clearly distinguishable from the other CNL clades,  
296 despite being typical CNLs (Fig. 6A). We also found that NLRs of nine of ten species (except  
297 *S. moellendorffii*) were present in the G10 clade. To determine whether G10 is a unique clade  
298 among a wide variety of species, we analyzed the NLR repertoires in each plant species based  
299 on their clustering in the phylogenetic tree. Interestingly, G10 was present in all of the plant  
300 species examined, even in the most ancestral angiosperm and gymnosperm plants (Fig. 6B,  
301 Dataset S3). These results suggest that G10-NLRs are distinct from other conventional CNLs  
302 and have existed since the emergence of seed plants.

303 Next, we examined the commonality of G10-CC-mediated cell death among other plants.  
304 Representative G10-CCs from five plant species (pepper, tomato, potato, tobacco, and rice)  
305 were randomly chosen from a subclade in the phylogenetic tree (Dataset S4). More than 40%

306 of tested G10-CCs from Solanaceae plants and even taxonomically distant rice trigger cell  
307 death in *N. benthamiana* (Fig. 6C, *SI Appendix*, Table S3). In addition, a recent study  
308 reported that significantly high portion of the predicted CC domain of the CNLs in *A.*  
309 *thaliana* ecotype Columbia-0 triggered cell death (49). All of the CNLs from group B  
310 described by Wroblewski *et al.*, except At1g63360, belonged to the G10-NLR group  
311 according to our classification, and 13 of 22 G10-CC domain fragments induced cell death in  
312 *N. benthamiana* (49). Considered in light of this previous report, our results indicate that the  
313 G10-CCs of not only Solanaceae plants but also evolutionarily distant rice trigger cell death.

## 314 **Discussion**

315 NLR proteins are one of the largest and most widespread families of intracellular immune  
316 receptors in plants. These proteins activate potent immune responses that often accompany a  
317 HR. In this study, we demonstrated that among the 14 known NLR groups in pepper, G10 is a  
318 major NLR with an autoactive NTD. Autoactive G10-CC-induced cell death resembles R  
319 gene-mediated HR and immune responses, suggesting that G10-NLRs can trigger immune  
320 signaling. Analyses of pepper G10-CC sequences revealed that non-autoactive CCs contain  
321 partial deletions or variations in the  $\alpha 1$  helix region and the 'TAILSP' motif is critical for cell  
322 death-inducing activity. G10-CC autoactivity requires a minimum of four  $\alpha$ -helices.  
323 Furthermore, cell death mediated by G10-CCs is independent of helper NLRs. Remarkably,  
324 G10-NLRs are widely conserved in seed plants, and G10-CCs of other plant species, such as  
325 Solanaceae and even non-Solanaceae plants, induce cell death in *N. benthamiana*.

326 Some NLRs function as sensor/signaling pairs. Sensor NLRs contain additional unusual  
327 non-conserved domains that function in pathogen recognition and are coupled to a helper  
328 NLR (also known as an 'executor') to initiate immune signaling (12). Sensor NLRs form  
329 heterodimers with executor NLRs to suppress autoactivity in the absence of pathogen  
330 detection (13, 14). The recognition of a pathogen by a sensor NLR leads to a change in the  
331 executor NLR state from inactive to active. Generally, NLR pairs are genetically linked and  
332 oriented head-to-head, sharing a promoter for simultaneous regulation of transcription (15,  
333 50). We found that autoactive G10-NLRs are not oriented head-to-head in the upstream  
334 region and do not contain the additional integrated domain (*SI Appendix*, Table S1).  
335 Additional genome-wide analyses using updated pseudomolecules identified 19 NLR pairs in  
336 a head-to-head orientation in pepper (38). Only one G10-NLR (referred to as CaNBARC403)  
337 was identified; however, CaNBARC403 does not exhibit autoactivity and does not have an  
338 additional domain in its upstream flanking gene (*SI Appendix*, Table S4). These data suggest  
339 that autoactive G10-NLRs in pepper do not function as executors in NLR pairs and their  
340 activity is regulated by negative regulatory protein(s) rather than inactive-state NLRs, such as  
341 RIN4, which negatively regulates RPS2 (51). These data indicate that conventional paired  
342 NLRs do not exist in pepper G10-NLRs.

343 Based on several lines of evidence, we propose that pepper G10-NLRs should be  
344 classified as a new putative singleton NLR clade. First, we found that many G10-CCs from  
345 Solanaceae plants, including pepper, potato, tobacco and tomato, trigger autoactivity in *N.*  
346 *benthamiana* (Table1, *SI Appendix*, Table S3 and Fig. 6). In addition, a recent study reported  
347 that 13 of 22 *Arabidopsis* CNLs in group B that belong to G10 in our classification trigger

348 cell death in *Arabidopsis* (49). Taken together, these results indicate that many G10-CCs in  
349 Solanaceae and Brassicaceae plants have the potential to trigger cell death (*SI Appendix*,  
350 Table S3). Second, G10-CCs from taxonomically distant plants triggered visible cell death in  
351 *N. benthamiana*. We demonstrated that G10-CCs of monocot rice induce cell death in *N.*  
352 *benthamiana* (Fig. 6, *SI Appendix*, Table S3). In addition, among 22 *Arabidopsis* G10-CCs,  
353 13 in *N. benthamiana* and 5 in lettuce have been shown to induce cell death (49). Third, a  
354 functional analysis of known R genes reported that G10-NLRs specifically sense cognate  
355 effector proteins (24, 37). The CC domain of the functional G10-NLR RPS5 was shown to  
356 play an important role in recognizing the cognate effector AvrPphB (24). Previously, we  
357 reported that the LRR domain of Pvr4 is important for recognition of PepMoV-NIb, based on  
358 a domain-swap experiment with the susceptible allele of Pvr4 (37). Taken together, these data  
359 indicate that G10-NLRs function in effector recognition as well as initiation of immune  
360 signaling. Finally, the proposed classification of pepper G10-NLRs as a new putative  
361 singleton NLR clade is also supported by the finding of sustainable cell death mediated by  
362 G10-CC or G10-NLR in helper NLR-silenced plants such as RNLs and NRCs (Fig. 5).

363 The phylogenetic tree analysis indicated that G10 is an NRC-independent clade (Fig. 6A).  
364 However, it is doubtful that all G10-NLRs across plant species utilize the same mechanism to  
365 confer resistance, as the helper NLRs ADR1 and NRG1 are either completely or partially  
366 required for cell death mediated by RPS2, a G10-NLR in *Arabidopsis* (22). Interestingly, we  
367 found that RPS2 also induces cell death in helper NLR-silenced *N. benthamiana*  
368 (unpublished data). Therefore, an alternative scenario is that G10-NLRs do not require other  
369 NLR genes to function in evolutionarily distant plants, and downstream signaling  
370 components for G10-mediated cell death are well conserved over a wide range of plant  
371 species. Adachi *et al.* recently suggested that NLRs evolved from multifunctional singleton  
372 receptors into functionally specialized and diversified receptor pairs and intricate receptor  
373 networks (8). We demonstrated that G10 forms a distinct phylogenetic cluster that includes  
374 several cloned functional R genes: *Pvr4* and *Tsw* in pepper and *RPS2* and *RPS5* in  
375 *Arabidopsis* (34, Fig. 6A, Dataset S3). We also demonstrated that G10 is the only one well  
376 conserved across multiple plant species, including the basal angiosperm *A. trichopoda* and  
377 the gymnosperm *P. abies* (Fig. 6B, *SI Appendix*, Table S5). A previous study also reported  
378 that the AN-C2 group corresponding to G10 is an ancestral angiosperm lineage, suggesting  
379 that G10-NLRs are ancient compared with other CNL groups (52).

380 In this study, using an unprecedented high proportion of tested CC domains compared to  
381 other groups, we found that pepper G10-CCs exhibit autoactivity (Table 1). However, G10-



382 NLRs are not the only group that contains autoactive CC domains. It was reported that  
383 transient overexpression with the tomato or tobacco CC domain of the I2-like NLR induces  
384 cell death in *N. benthamiana*, but this does not occur with the CC domain of pepper I2-like  
385 NLRs (31). Interestingly, C-terminal tagging of the CC domain of pepper I2-like NLR with  
386 enhanced yellow fluorescent protein (note that the pepper I2-like NLRs belong to G4)  
387 strongly triggers cell death upon transient overexpression in *N. benthamiana*. This tag-  
388 dependent autoactivity has been observed with several CC domains of NLRs, regardless of  
389 the level of protein accumulation (31). Both GFP and YFP are known to have a weak  
390 tendency toward dimerization, which could have an effect on autoactivity. These results  
391 suggest that in pepper G4-NLRs, the CC domain evolved differently after speciation to  
392 require additional domain(s) for oligomerization to trigger immune signaling; mechanistically,  
393 G4- and G10-NLRa appear to behave differently in terms of inducing cell death.

394 Analyses of pepper G10-CC sequences indicated the presence of partial deletions or  
395 variations in the  $\alpha 1$  helix region in non-autoactive CCs (Fig. 2 and *SI Appendix*, Fig. S4).  
396 Mutations in the  $\alpha 1$  helix of G10-CC or G10-NLR compromised their cell death-inducing  
397 activity (Fig. 3). This region is matched with a ZAR1  $\alpha 1$  helix forming funnel-shaped  
398 structure in the PM after conformational switching during activation of the ZAR1 resistosome,  
399 and amphipathic residues in the ZAR1  $\alpha 1$  helix are known to be essential for cell death-  
400 inducing activity (32, 47). Collectively, these data indicate that the  $\alpha 1$  helix is important for  
401 triggering cell death in singleton NLRs. However, the  $\alpha 1$  helix of pepper G10-CCs is  
402 required for cell death-inducing activity but does not affect PM localization. It would be  
403 interesting to examine in future experiments whether pepper G10-CCs or G10-NLRs form  
404 multimers similar to the ZAR1 resistosome in order to elucidate the general mechanism of  
405 NLR-induced cell death. Here, we suggest that G10-NLRs not only serve as valuable  
406 resources for increasing our understanding of the molecular basis of NLR-mediated cell death  
407 but also provide critical information for identifying new disease-resistance genes in crop  
408 plants.



## Materials and Methods

### Plant materials and growth conditions

*Nicotiana benthamiana* plants were grown in horticultural bed soil (Biogreen, Seoul Bio Co., Ltd., Seoul, Korea) in a well-maintained chamber under conditions of 16-h/8-h photoperiod, temperature of 25°C, photosynthetic photon flux density of 80~100  $\mu\text{mol m}^{-2} \text{s}^{-1}$  and relative humidity of 70%. Four-week-old plants were used for transient overexpression. Foliage leaves of 2-week-old plants were inoculated with *Agrobacterium* for VIGS.

### Identification of NLRs and phylogenetic tree analysis

Annotated protein sequences of *Capsicum annuum* v1.55 (53), *Nicotiana tabacum* Nitab v4.5 (54), *Oryza sativa* RGAP 7.0 (55), *Picea abies* v1.0 (56), *Piper nigrum* v1.0 (57), *Selaginella moellendorffii* v1.0 (58), *Solanum lycopersicum* ITAG 2.4 (59), *Solanum tuberosum* PGSC 3.4 (60) and known NLR genes from the Genbank and Plant Resistance Genes database v3.0 (61) were used in this study. NLR identification and classification methods were based on a previous study (34), with some modifications. To identify NLRs containing the NB-ARC domain (PF00931), InterProScan v5.22-61 (62) was performed with default parameters. Subsequently, these NLRs were scanned with MAST implemented in MEME v4.9.1 (63) using NB-ARC motif information from NLR-Parser v1.0 (64, 65). NB-ARC domains with at least three of the four major motifs (P-loop, GLPL, Kinase2 and MHDV) in order and a length of at least 160 aa were selected as intact NB-ARC domains and aligned using MAFFT v7.407 (--maxiterate 1000 --globalpair) (66). Positions containing gaps of  $\geq 90\%$  in multiple sequence alignment were trimmed using TrimAl v1.4.rev22 (67). Phylogenetic relationships were reconstructed based on the maximum-likelihood method using IQ-Tree v1.6.12 (68), with 1000 ultrafast bootstrap approximation (UFBoot) (-bb 1000 -safe) (69). Substitution models were selected using ModelFinder (70) implemented in IQ-Tree. The best-fit model was JTT+F+R9. NLR groups were assigned based on known NLR genes, UFBoot value  $>90\%$  and previously assigned group information (34). Phylogenetic trees and heatmaps of the proportion of intact NB-ARC domains for each NLR group in plant species were plotted using ggtree v1.6.11 (71, 72). The plant species tree was generated using TimeTree (73).

### Plasmid construction

Fragments of pepper NLRs were amplified from genomic DNA of *Capsicum annuum* L. cv Criollo de Morelos 334 (CM334) based on the pepper reference annotation v.1.55 (53). To amplify target genes, primers were specifically designed within 1 kb of the 5'- or 3'-UTR for

each gene. Amplicons were cloned into the pCAMBIA2300-LIC vector containing a cauliflower mosaic virus 35S promoter and nopaline synthase terminator using the ligation-independent cloning (LIC) method (36, 74). The N-terminal domain of an NLR was defined as spanning from methionine to just before the p-loop motif in the NB-ARC domain. Amplified NTD fragments were cloned into the pCAMBIA2300-LIC or pCAMBIA2300-3xFLAG-LIC vector in the same manner as full-length NLRs. For cloning of CC domains from other plant species, the fragments were amplified from genomic DNA of rice (*Oryza sativa* L. cv. Nakdong) and tobacco (*Nicotiana tabacum* cv. Xanthi) or cDNA of tomato (*Solanum lycopersicum* cv. Heinz) and potato (*Solanum tuberosum*). To silence *NRC2/3/4*, 285 bp of *NbNRC2*, 334 bp of *NbNRC3* and 272 bp of *NbNRC4* were combined by overlap PCR, and then the overlapped fragment was cloned into the pTRV2-LIC vector. For RNL silencing, a 283-bp fragment of *NbNRG1* and 329-bp fragment of *NbADR1* were combined by overlap PCR, and then the overlapped fragment was cloned into the TRV2-LIC vector. The primers used for PCR in this study are listed in Dataset S4.

#### **Site-directed and motif-swap mutagenesis**

N-terminal motif-swap and site-directed mutants were generated using specific primers carrying the desired mutations. The amplified fragments for tag fusion proteins were cloned into the pCAMBIA2300-3xFLAG-LIC or pCAMBIA2300-eGFP-LIC vector using a ligation-independent cloning method.

#### **Disease-resistance assay**

For PVX:GFP co-expression, *A. tumefaciens* GV3101 carrying the PVX:GFP-expressing binary vector was co-infiltrated with G10-CCs, G10-NLRs and Pvr4/NiB. At 30 hours post-infiltration (hpi), the intensity of GFP fluorescence was measured using a closed FluorCam (Photon Systems Instruments, Czech Republic) with a GFP filter to quantify PVX replication.

#### ***Agrobacterium*-mediated transient overexpression in *N. benthamiana***

*Agrobacterium tumefaciens* GV3101 strains carrying the various constructs were prepared for transient overexpression. Bacteria were grown overnight at 28°C in LB medium supplemented with kanamycin (50 µg/ml) and rifampicin (50 µg/ml). The cells were then pelleted and resuspended in infiltration buffer (10 mM MES [pH 5.6] and 10 mM MgCl<sub>2</sub> with 150 µM acetosyringone) at an optical density at 600 nm (OD<sub>600</sub>) of 0.3 for CC domains or 0.6 for full-length NLRs and R genes. To screen G10-CCs from tomato, tobacco, potato, and

rice, G10-CCs were co-expressed with the gene-silencing suppressor, p19 (final OD<sub>600</sub> = 0.25). Agrobacterial suspensions were applied to infiltrate the abaxial leaves of 4-week-old *N. benthamiana* plants using a needleless syringe. Macroscopic cell death phenotypes were detected using a fluorescence-labeled organism bioimaging instrument system (Neoscience, Korea). The degree of cell death was reported as quantum yield (Fv/Fm) using a closed FluorCam (Photon Systems Instruments).

### **Virus-induced gene silencing**

VIGS was performed in *N. benthamiana* as described by Liu *et al.* (75). Suspensions of pTRV1 and pTRV2 carrying the target gene fragment were mixed in a 1:1 ratio in infiltration buffer at a final OD<sub>600</sub> of 0.15. Two leaves of 2-week-old *N. benthamiana* seedlings were infiltrated with the *Agrobacterium* suspension mixture. Three weeks later, the upper leaves were collected to confirm silencing of the target gene and used for subsequent experiments.

### **Gene expression assay**

Total RNA was extracted using TRIzol reagent (MRC, OH, USA), and cDNA was synthesized using Superscript II (Invitrogen, CA, USA). Gene-specific primers were used for quantitative RT-PCR at 95°C for 5 min, followed by 40 cycles of denaturation at 95°C for 15 s and 55°C for 1 min. qRT-PCR was performed using a CFX96 real-time PCR instrument (Bio-Rad, USA) with SsoAdvanced universal SYBR green supermix (Bio-Rad). Nucleotide sequences of all primers used in this study are listed in Dataset S3. Gene transcript levels were normalized to that of the elongation factor gene, *NbEF1-α*.

### **Confocal laser scanning microscopy**

Cells expressing GFP-tagged proteins were examined using a Leica confocal microscope SP8X (Leica Microsystem, Germany) with 40×/1.0 water-dipping objective. GFP-expressing cells were imaged using 488-nm excitation and detection of emission from 500–530 nm. Simultaneous excitation of GFP and plasma membrane marker dye, FM4-64 (Invitrogen), was performed using 488-nm excitation and detection of emission signals at 500–530 nm and 600–650 nm for GFP and FM4-64, respectively.

### **DAB staining**

Accumulation of H<sub>2</sub>O<sub>2</sub> was monitored by DAB staining. *Nicotiana benthamiana* leaves were detached and incubated in DAB-HCl solution (1 mg/ml, pH 3.8) overnight at 25°C in the dark. After staining, the leaves were soaked in 95% ethanol to remove chlorophyll.

### **Immunoblot analysis**

Leaf tissue (50 mg) of *N. benthamiana* was ground into fine powder in liquid nitrogen and homogenized in 200 µl of extraction buffer (50 mM Tris-HCl [pH 7.5], 100 mM NaCl, 1 mM EDTA, 1% [v/v] IGEPAL CA-630, 10% glycerol, 5 mM DTT, 1 mM NaF, 1 mM PMSF, 1× EDTA-free protease inhibitor cocktail [Roche]). The lysates were cleared by centrifugation at 12,000 g for 10 min at 4°C. Samples were loaded on an 8 or 10% SDS-PAGE gel, and proteins were detected after blotting with anti-FLAG M2 antibody (SIGMA) (1:10,000 dilution) or anti-HA antibody (Abcam) (1:5,000 dilution).

### **Quantification and statistical analyses**

Statistical analyses and graph generation were performed using Prism7 software (GraphPad). Error bars in all figures represent the standard deviation of the mean. The number of replicates is reported in the figure legends. Statistical comparisons between different samples was carried out by one-way or two-way analysis of variance (ANOVA) with Sidak's multiple comparisons or Dunnett's multiple comparisons tests. Samples exhibiting statistically significant differences are marked in the figures with asterisks or letters.

## **Acknowledgments**

We are thankful to Dr. Hyun-Ah Lee, Dr. Eunyong Seo, Jihyun Kim and Haeun Kim for construction of NLRs and NTDs. This work was supported by the National Research Foundation of Korea (NRF) grant funded by the Korea government (MSIT) (No. 2018R1A5A1023599 (SRC) and 2018R1A2A1A05019892).

## References

1. J. L. Dangl, D. M. Horvath, B. J. Staskawicz, Pivoting the plant immune system from dissection to deployment. *Science* **341**, 746-751 (2013).
2. P. N. Dodds, J. P. Rathjen, Plant immunity: towards an integrated view of plant-pathogen interactions. *Nat. Rev. Genet.* **11**, 539-548 (2010).
3. P. Moffett, G. Farnham, J. Peart, D. C. Baulcombe, Interaction between domains of a plant NBS-LRR protein in disease resistance-related cell death. *Embo J.* **21**, 4511-4519 (2002).
4. J. Wang *et al.*, Ligand-triggered allosteric ADP release primes a plant NLR complex. *Science* **364**, (2019).
5. V. Bonardi, K. Cherkis, M. T. Nishimura, J. L. Dangl, A new eye on NLR proteins: focused on clarity or diffused by complexity? *Curr. Opin. Immunol.* **24**, 41-50 (2012).
6. X. Meng, S. Zhang, MAPK cascades in plant disease resistance signaling. *Annu. Rev. Phytopathol.* **51**, 245-266 (2013).
7. F. Jacob, S. Vernaldi, T. Maekawa, Evolution and conservation of plant NLR functions. *Front. Immunol.* **4**, 297 (2013).
8. H. Adachi, L. Derevnina, S. Kamoun, NLR singletons, pairs, and networks: evolution, assembly, and regulation of the intracellular immunoreceptor circuitry of plants. *Curr. Opin. Plant Biol.* **50**, 121-131 (2019).
9. A. -M. Catanzariti *et al.*, The AvrM effector from flax rust has a structured C-terminal domain and interacts directly with the M resistance protein. *Mol. Plant Microbe Interact.* **23**, 49-57 (2010).
10. K. V. Krasileva, D. Dahlbeck, B. J. Staskawicz, Activation of an Arabidopsis resistance protein is specified by the in planta association of its leucine-rich repeat domain with the cognate oomycete effector. *Plant Cell* **22**, 2444-2458 (2010).
11. I. M. Saur *et al.*, Multiple pairs of allelic MLA immune receptor-powdery mildew AVR<sub>A</sub> effectors argue for a direct recognition mechanism. *Elife* **8**, (2019).
12. L. Rodriguez-Moreno, Y. Song, B. P. Thomma, Transfer and engineering of immune receptors to improve recognition capacities in crops. *Curr. Opin. Plant Biol.* **38**, 42-49 (2017).
13. H. Jin *et al.*, NPK1, an MEKK1-like mitogen-activated protein kinase kinase kinase, regulates innate immunity and development in plants. *Dev. Cell* **3**, 291-297 (2002).
14. Y. Zhang, S. Dorey, M. Swiderski, J. D. G. Jones, Expression of *RPS4* in tobacco induces an AvrRps4-independent HR that requires EDS1, SGT1 and HSP90. *Plant J.* **40**, 213-224 (2004).

15. S. B. Saucet *et al.*, Two linked pairs of *Arabidopsis* *TNL* resistance genes independently confer recognition of bacterial effector AvrRps4. *Nat. Commun.* **6**, 6338 (2015).
16. C. -H. Wu *et al.*, NLR network mediates immunity to diverse plant pathogens. *Proc. Natl. Acad. Sci. U.S.A.* **114**, 8113-8118 (2017).
17. J. D. G. Jones, J. L. Dangl, The plant immune system. *Nature* **444**, 323-329 (2006).
18. B. C. Meyers, A. Kozik, A. Griego, H. Kuang, R. W. Michelmore, Genome-wide analysis of NBS-LRR-encoding genes in *Arabidopsis*. *Plant Cell* **15**, 809-834 (2003).
19. J. R. Peart, P. Mestre, R. Lu, I. Malcuit, D. C. Baulcombe, NRG1, a CC-NB-LRR protein, together with N, a TIR-NB-LRR protein, mediates resistance against tobacco mosaic virus. *Curr. Biol.* **15**, 968-973 (2005).
20. V. Bonardi *et al.*, Expanded functions for a family of plant intracellular immune receptors beyond specific recognition of pathogen effectors. *Proc. Natl. Acad. Sci. U.S.A.* **108**, 16463-16468 (2011).
21. S. M. Collier, L. -P. Hamel, P. Moffett, Cell death mediated by the N-terminal domains of a unique and highly conserved class of NB-LRR protein. *Mol. Plant Microbe Interact.* **24**, 918-931 (2011).
22. B. Castel *et al.*, Diverse NLR immune receptors activate defence via the RPW8-NLR NRG1. *New Phytol.* **222**, 966-980 (2019).
23. T. S. Mucyn *et al.*, The tomato NBARC-LRR protein Prf interacts with Pto kinase in vivo to regulate specific plant immunity. *Plant Cell* **18**, 2792-2806 (2006).
24. J. Ade, B. J. DeYoung, C. Golstein, R. W. Innes, Indirect activation of a plant nucleotide binding site-leucine-rich repeat protein by a bacterial protease. *Proc. Natl. Acad. Sci. U.S.A.* **104**, 2531-2536 (2007).
25. T. M. Burch-Smith *et al.*, A novel role for the TIR domain in association with pathogen-derived elicitors. *PLoS Biol.* **5**, e68 (2007).
26. M. A. Sacco, S. Mansoor, P. Moffett, A RanGAP protein physically interacts with the NB-LRR protein Rx, and is required for Rx-mediated viral resistance. *Plant J.* **52**, 82-93 (2007).
27. P. Mestre, D. C. Baulcombe, Elicitor-mediated oligomerization of the tobacco N disease resistance protein. *Plant Cell* **18**, 491-501 (2006).
28. M. Bernoux *et al.*, Structural and functional analysis of a plant resistance protein TIR domain reveals interfaces for self-association, signaling, and autoregulation. *Cell Host Microbe* **9**, 200-211 (2011).
29. T. Maekawa *et al.*, Coiled-coil domain-dependent homodimerization of intracellular



barley immune receptors defines a minimal functional module for triggering cell death. *Cell Host Microbe* **9**, 187-199 (2011).

30. L. W. Casey *et al.*, The CC domain structure from the wheat stem rust resistance protein Sr33 challenges paradigms for dimerization in plant NLR proteins. *Proc. Natl. Acad. Sci. U.S.A.* **113**, 12856-12861 (2016).

31. L. -P. Hamel *et al.*, The chloroplastic protein THF1 interacts with the coiled-coil domain of the disease resistance protein N' and regulates light-dependent cell death. *Plant Physiol.* **171**, 658-674 (2016).

32. J. Wang *et al.*, Reconstitution and structure of a plant NLR resistosome conferring immunity. *Science* **364**, (2019).

33. F. Chiarini, G. Bernardello, Karyotype studies in South American species of *Solanum* subgen. *Leptostemonum* (Solanaceae). *Plant Biol. (Stuttg)* **8**, 486-493 (2006).

34. E. Seo, S. Kim, S. -I. Yeom, D. Choi, Genome-wide comparative analyses reveal the dynamic evolution of nucleotide-binding leucine-rich repeat gene family among Solanaceae plants. *Front. Plant Sci.* **7**, 1205 (2016).

35. S. -B. Kim, H. -Y. Lee, S. Seo, J. H. Lee, D. Choi, RNA-dependent RNA polymerase (NIb) of the potyviruses is an avirulence factor for the broad-spectrum resistance gene *Pvr4* in *Capsicum annum* cv. CM334. *PLoS One* **10**, e0119639 (2015).

36. S. -B. Kim *et al.*, Divergent evolution of multiple virus-resistance genes from a progenitor in *Capsicum* spp. *New Phytol.* **213**, 886-899 (2017).

37. S. -B. Kim *et al.*, The coiled-coil and leucine-rich repeat domain of the potyvirus resistance protein Pvr4 has a distinct role in signaling and pathogen recognition. *Mol. Plant Microbe Interact.* **31**, 906-913 (2018).

38. S. Kim *et al.*, New reference genome sequences of hot pepper reveal the massive evolution of plant disease-resistance genes by retroduplication. *Genome Biol.* **18**, 210 (2017).

39. O. C. A. Sukarta, E. J. Sloatweg, A. Goverse, Structure-informed insights for NLR functioning in plant immunity. *Semin. Cell Dev. Biol.* **56**, 134-149 (2016).

40. M. Baudin, J. A. Hassan, K. J. Schreiber, J. D. Lewis, Analysis of the ZAR1 immune complex reveals determinants for immunity and molecular interactions. *Plant Physiol.* **174**, 2038-2053 (2017).

41. M. R. Swiderski, D. Birker, J. D. G. Jones, The TIR domain of TIR-NB-LRR resistance proteins is a signaling domain involved in cell death induction. *Mol. Plant Microbe Interact.* **22**, 157-165 (2009).

42. N. Ishihama, R. Yamada, M. Yoshioka, S. Katou, H. Yoshioka, Phosphorylation of the

*Nicotiana benthamiana* WRKY8 transcription factor by MAPK functions in the defense response. *Plant Cell* **23**, 1153-1170 (2011).

43. S. Gopalan, W. Wei, S. Y. He, *hrp* gene-dependent induction of *hin1*: a plant gene activated rapidly by both harpins and the *avrPto* gene-mediated signal. *Plant J.* **10**, 591-600 (1996).

44. C. Weitzel, H. T. Simonsen, Cytochrome P450-enzymes involved in the biosynthesis of mono- and sesquiterpenes. *Phytochem. Rev.* **14**, 7-24 (2015).

45. J. Glazebrook, Contrasting mechanisms of defense against biotrophic and necrotrophic pathogens. *Annu. Rev. Phytopathol.* **43**, 205-227 (2005).

46. D. Qi, B. J. DeYoung, R. W. Innes, Structure-function analysis of the coiled-coil and leucine-rich repeat domains of the RPS5 disease resistance protein. *Plant Physiol.* **158**, 1819-1832 (2012).

47. H. Adachi *et al.*, An N-terminal motif in NLR immune receptors is functionally conserved across distantly related plant species. *Elife* **8**, (2019).

48. A. M. Jones, S. Coimbra, A. Fath, M. Sottomayor, H. Thomas, Programmed cell death assays for plants. *Methods Cell Biol.* **66**, 437-451 (2001).

49. T. Wróblewski *et al.*, Genome-wide functional analyses of plant coiled-coil NLR-type pathogen receptors reveal essential roles of their N-terminal domain in oligomerization, networking, and immunity. *PLoS Biol.* **16**, e2005821 (2018).

50. M. Narusaka *et al.*, *RRS1* and *RPS4* provide a dual *Resistance*-gene system against fungal and bacterial pathogens. *Plant J.* **60**, 218-226 (2009).

51. B. Day *et al.*, Molecular basis for the RIN4 negative regulation of RPS2 disease resistance. *Plant Cell* **17**, 1292-1305 (2005).

52. Z. -Q. Shao *et al.*, Large-scale analyses of angiosperm nucleotide-binding site-leucine-rich repeat genes reveal three anciently diverged classes with distinct evolutionary patterns. *Plant Physiol.* **170**, 2095-2109 (2016).

53. S. Kim *et al.*, Genome sequence of the hot pepper provides insights into the evolution of pungency in *Capsicum* species. *Nat. Genet.* **46**, 270-278 (2014).

54. K. D. Edwards *et al.*, A reference genome for *Nicotiana tabacum* enables map-based cloning of homeologous loci implicated in nitrogen utilization efficiency. *BMC Genomics* **18**, 448 (2017).

55. Y. Kawahara *et al.*, Improvement of the *Oryza sativa* Nipponbare reference genome using next generation sequence and optical map data. *Rice (N.Y.)* **6**, 4 (2013).

56. B. Nystedt *et al.*, The Norway spruce genome sequence and conifer genome evolution.

*Nature* **497**, 579-584 (2013).

57. L. Hu *et al.*, The chromosome-scale reference genome of black pepper provides insight into piperine biosynthesis. *Nat. Commun.* **10**, 4702 (2019).

58. J. A. Banks *et al.*, The Selaginella genome identifies genetic changes associated with the evolution of vascular plants. *Science* **332**, 960-963 (2011).

59. Tomato Genome Consortium, The tomato genome sequence provides insights into fleshy fruit evolution. *Nature* **485**, 635-641 (2012).

60. Potato Genome Sequencing Consortium, Genome sequence and analysis of the tuber crop potato. *Nature* **475**, 189-195 (2011).

61. C. M. Osuna-Cruz *et al.*, PRGdb 3.0: a comprehensive platform for prediction and analysis of plant disease resistance genes. *Nucleic Acids Res.* **46**, D1197-D1201 (2018).

62. P. Jones *et al.*, InterProScan 5: genome-scale protein function classification. *Bioinformatics* **30**, 1236-1240 (2014).

63. T. L. Bailey *et al.*, MEME SUITE: tools for motif discovery and searching. *Nucleic Acids Res.* **37**, W202-W208 (2009).

64. F. Jupe *et al.*, Identification and localisation of the NB-LRR gene family within the potato genome. *BMC Genomics* **13**, (2012).

65. B. Steuernagel, F. Jupe, K. Witek, J. D. G. Jones, B. B. H. Wulff, NLR-parser: rapid annotation of plant NLR complements. *Bioinformatics* **31**, 1665-1667 (2015).

66. K. Katoh, D. M. Standley, MAFFT multiple sequence alignment software version 7: improvements in performance and usability. *Mol. Biol. Evol.* **30**, 772-780 (2013).

67. S. Capella-Gutiérrez, J. M. Silla-Martínez, T. Gabaldón, trimAl: a tool for automated alignment trimming in large-scale phylogenetic analyses. *Bioinformatics* **25**, 1972-1973 (2009).

68. L. -T. Nguyen, H. A. Schmidt, A. von Haeseler, B. Q. Minh, IQ-TREE: a fast and effective stochastic algorithm for estimating maximum-likelihood phylogenies. *Mol. Biol. Evol.* **32**, 268-274 (2015).

69. D. T. Hoang, O. Chernomor, A. von Haeseler, B. Q. Minh, L. S. Vinh, UFBoot2: improving the ultrafast bootstrap approximation. *Mol. Biol. Evol.* **35**, 518-522 (2018).

70. S. Kalyaanamoorthy, B. Q. Minh, T. K. F. Wong, A. von Haeseler, L. S. Jermin, ModelFinder: fast model selection for accurate phylogenetic estimates. *Nat. Methods* **14**, 587-589 (2017).

71. G. Yu, D. K. Smith, H. Zhu, Y. Guan, T. T. -Y. Lam, GGTREE: an R package for visualization and annotation of phylogenetic trees with their covariates and other associated

data. *Methods Ecol. Evol.* **8**, 28-36 (2017).

72. G. Yu, T. T. -Y. Lam, H. Zhu, Y. Guan, Two methods for mapping and visualizing associated data on phylogeny using ggtree. *Mol. Biol. Evol.* **35**, 3041-3043 (2018).

73. S. Kumar, G. Stecher, M. Suleski, S. B. Hedges, TimeTree: a resource for timelines, timetrees, and divergence times. *Mol. Biol. Evol.* **34**, 1812-1819 (2017).

74. S. -K. Oh, S. -B. Kim, S. -I. Yeom, H. -A. Lee, D. Choi, Positive-selection and ligation-independent cloning vectors for large scale in planta expression for plant functional genomics. *Mol. Cells* **30**, 557-562 (2010).

75. Y. Liu, M. Schiff, S. P. Dinesh-Kumar, Virus-induced gene silencing in tomato. *Plant J.* **31**, 777-786 (2002).

## Figure Legends

### Figure 1. Autoactive G10-NLR and G10-CC trigger defense-related cell death.

(A) CC309, NLR620 and Pvr4 with its cognate effector NlB induce cell death, but CC10-1 does not. EV (empty vector) was used as a negative control. The leaves of 4-week-old *N. benthamiana* were infiltrated with agrobacteria harboring each construct. Images were taken 3 days post infiltration. (B) Protein accumulation was confirmed by immunoblot analysis. Equal protein loading was confirmed by staining membranes with Ponceau S. Asterisks indicate the expected protein bands. (C) H<sub>2</sub>O<sub>2</sub> accumulated in CC309-, NLR620-, and Pvr4/NlB-infiltrated leaves but not CC10-1- or EV-infiltrated leaves. Leaves were stained with DAB at 2 dpi; n = 3. (D) Expression of defense-related genes, *HIN1*, *CYP71D20*, *WRKY8* and *PRI*, was dramatically elevated by CC309, NLR620, and Pvr4/NlB. Four-week-old *N. benthamiana* leaves infiltrated with EV, CC309, CC10-1, NLR620, and Pvr4/NlB were collected at various time points. The data are shown as mean ± SD (n = 3). (E) and (F) Enhanced resistance to *Potato virus X* mediated by CC309, NLR620 and Pvr4/NlB. pCAMBIA2300:GFP or PVX:GFP was co-infiltrated with agrobacteria carrying EV, CC309, CC10-1, NLR620, or Pvr4/NlB. (F) Accumulation of GFP was visualized at 30 hpi. GFP fluorescence emission was quantified using a FluorCam with a GFP filter. Letters indicate statistical differences as determined by one-way ANOVA with Sidak's multiple comparisons test. The above experiments were repeated two times with eight biological replicates.

### Figure 2. The first $\alpha$ -helix region is critical for autoactivity of G10-CC domains.

(A) Phylogenetic tree of G10-CCs (left) and length of the first  $\alpha$ -helix (right). The phylogenetic tree was constructed based on amino acid sequences of G10-CC domains. The maximum-likelihood model was used, and bootstrap analysis was performed with 1,000 replicates. The degree of cell death is represented as a grayscale circle to the left of the gene IDs (closed circle, strong; dark gray circle, medium; light gray circle, weak cell death; open circle, no cell death). (B) Alignment of CC domains in subclade I and schematic representation of the secondary structure of subclade I CC domains. Non-autoactive CC domains (CC474, CC292, CC310, CC368, and CC430) are deficient in an intact first  $\alpha$ -helix. The  $\alpha$ -helix and  $\beta$ -sheet are represented as yellow and green boxes, respectively.

### Figure 3. The N-terminal 'TAILSP' motif in subclade III G10-CCs is critical for autoactivity.

(A) Alignment of the N-terminal region of CC309 and CC10-1. Different residues are highlighted in green. (B) Co-localization of CC309-GFP and CC10-1-GFP with FM 4-64-labeled plasma membrane. Confocal microscopy images were taken at 26 hpi; bar = 20  $\mu$ m. (C) Schematic diagram of CC309 N-terminal chimeras with CC10-1. (D) Cell death induced by the CC309 and CC10-1 mutants described in (C). mCC10-1<sup>5-10</sup> (left lower circle) and mCC309<sup>1-6</sup> (right top circle) contain a 'TAILSP' motif. (E) Compromised cell death associated with defective 'TAILSP' motif in Pvr4 and the CC domain of Pvr4 (CC<sub>Pvr4</sub>). *Phytophthora sojae* necrosis-inducing protein (NIP) was used as a positive control for cell death. (F) Compromised cell death associated with I9E (left lower circle) and L10E (right top circle) point mutations in the TAILSP motif. All swap- or point mutants were transiently expressed in *N. benthamiana*, and cell death was visualized after 3 dpi. (G-I) Protein accumulation as described in (D), (E), and (F), respectively, was examined by Western blotting analysis. Equal protein loading was confirmed by staining membranes with Ponceau S. The above experiments were repeated at least three times with similar results.

**Figure 4. A minimum of four  $\alpha$ -helices ( $\alpha$ 1– $\alpha$ 4) are required for the cell death-inducing activity of CC309.**

(A) Schematic diagram of CC309 and deletion mutants. Secondary structure of CC309 was predicted using JPRED4. Predicted  $\alpha$ -helix is indicated by a yellow box. (B) The compromised cell death phenotype associated with the  $\alpha$ 1 (N1 and N2) or  $\alpha$ 4 helices (C3). Deletion mutants were transiently expressed in *N. benthamiana*, and the image was taken at 3 dpi. (C) Protein accumulation was analyzed by immunoblotting. (D) The degree of cell death is reported as quantum yield (Fv/Fm) determined using a closed FluorCam. Significance was determined using one-way ANOVA followed by Dunnett's multiple comparisons test, with asterisks denoting statistically significant differences: \*\*P < 0.01, \*\*\*P < 0.001. Data are the mean ( $\pm$  SD) of four biological replicates.

**Figure 5. Cell death induced by autoactive G10-CCs or G10-NLRs is independent of NRG1/ADRI- or NRC-type helper-mediated pathways.**

(A) Cell death phenotype induced by autoactive CC309, NLR620 and Pvr4 with Nib in *NRG1/ADRI*- or *NRC2/3/4*-silenced *N. benthamiana*. Agrobacteria carrying each clone were infiltrated 3 weeks after VIGS. The *NRC2/3/4*-dependent *P. infestans* resistance gene R8 and its cognate effector, Avr8, were used as helper-dependent controls. Each experiment was replicated independently two times (n = 10). Leaves were photographed at 3 dpi. (B) The

degree of cell death is reported as quantum yield (Fv/Fm) determined using a closed FluorCam. Significance was determined using one-way ANOVA followed by Dunnett's multiple comparisons test, with asterisks denoting statistically significant differences: \*P < 0.05, \*\*\*P < 0.0001. Data are the mean ( $\pm$  SD) of four biological replicates. (C) Relative transcript abundance for each gene was determined by quantitative RT-PCR analysis of silenced plants. The mean values ( $\pm$  SD) for transcript levels were normalized to that of *N. benthamiana* *EFL1-a*. Transcript levels of GFP-silenced plants were set to 1. Error bars represent the mean of three biological replicates, and asterisks denote significant differences at P < 0.0001 as determined by two-way ANOVA followed by Sidak's multiple comparisons test.

**Figure 6. G10-NLRs are conserved across seed plants, and G10-CCs of other plant species also induce cell death.**

(A) Intact NB-ARC domains in NLRs from 10 plant genomes were used to reconstruct the phylogenetic tree. Groups were assigned based on ultrafast bootstrap (UFBoot) values guided by classification of Solanaceae NLRs. Two NB-ARCs in *S. moellendorffii* were used as the outgroup. UFBoot values >90% are marked as red diamonds at the nodes. Black outline indicates NRC helper-dependent groups. Asterisk denotes the clade described as An-C14 in Shao *et al.* (B) The species tree (left) of nine plant genomes used in this study indicates their evolutionary relationships and divergence time. The proportion of NLRs of each group in plant species was visualized using a heatmap (right). (C) G10-CCs from Solanaceae plants (potato, tomato, and tobacco) and a monocot plant (rice) were expressed in *N. benthamiana*. Autoactive cell death is indicated by yellow circles, and no cell death is indicated by white circles. The frequency of cell death induced by G10-CC is presented below. Images were acquired at 3 dpi. The experiments were repeated three times with at least six biological replicates.



**Figure 1**

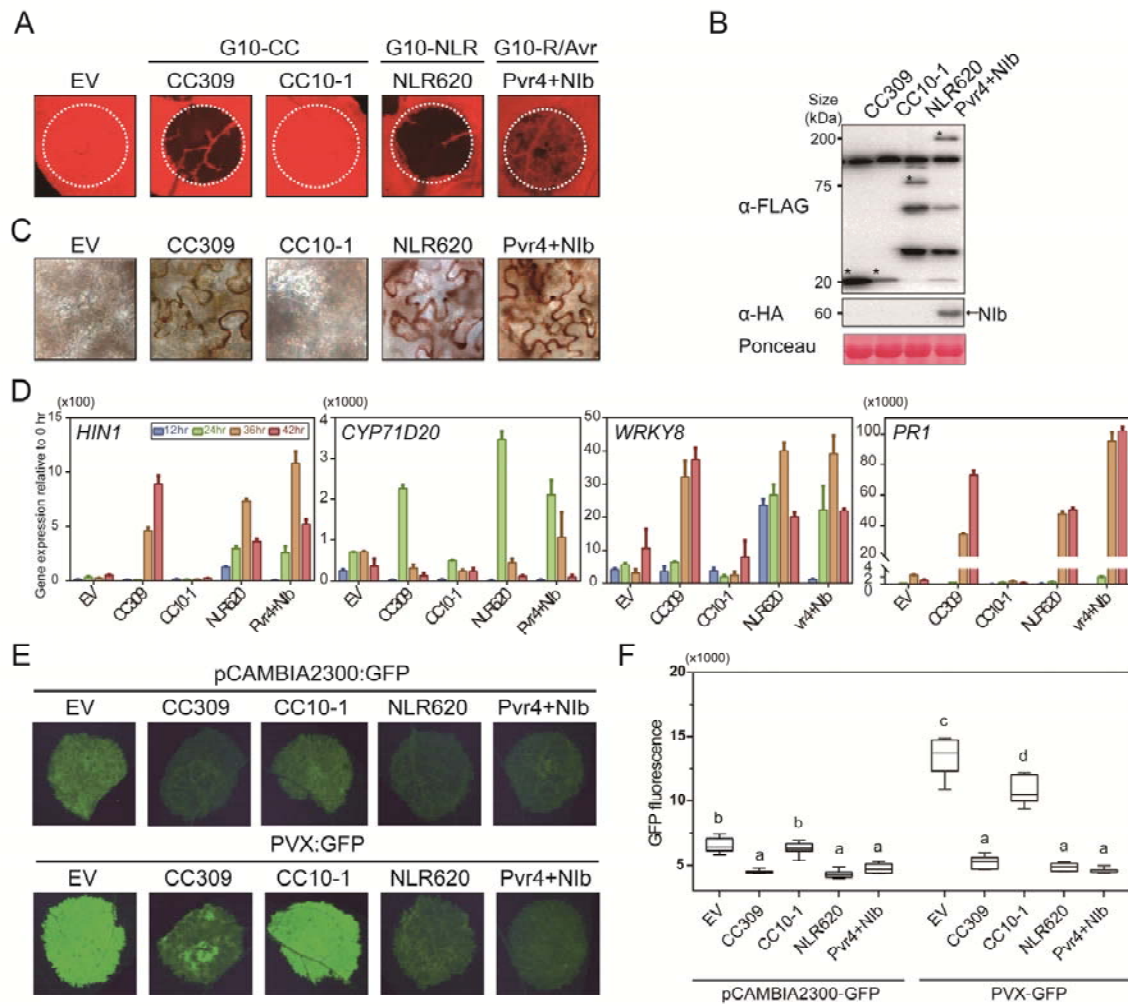

**Figure 2**

**A**

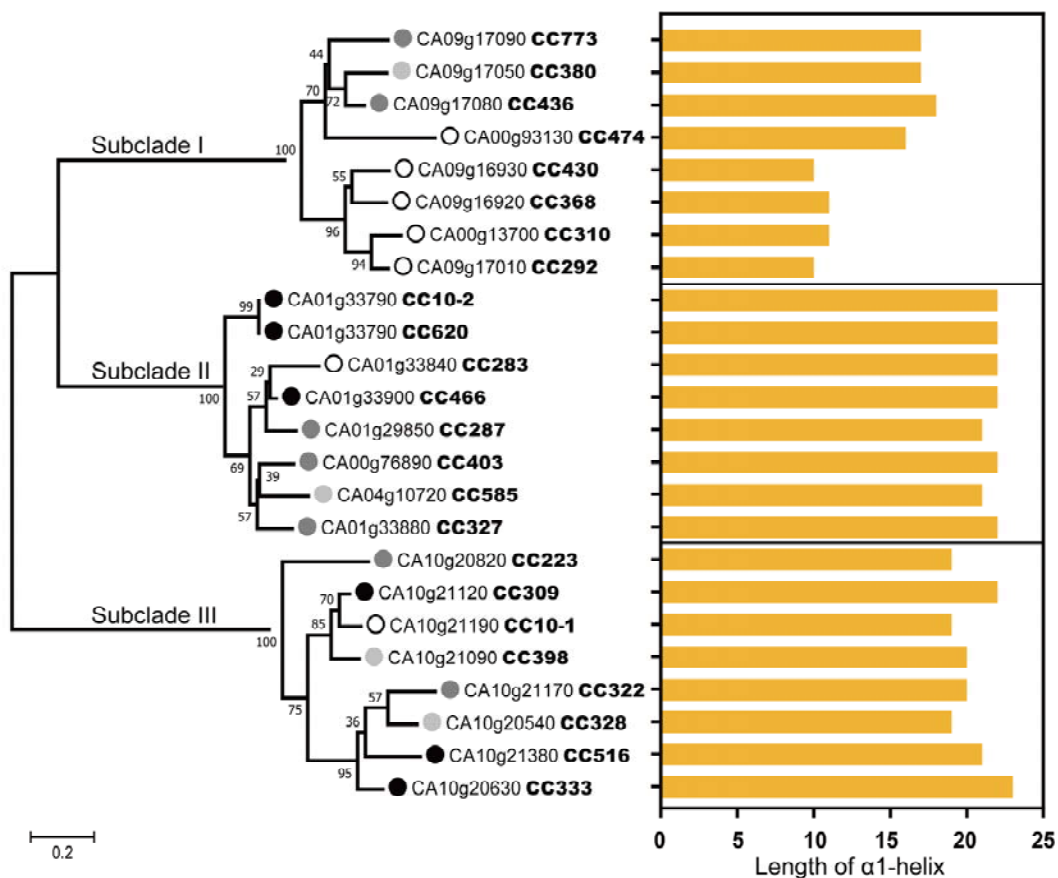

**B**

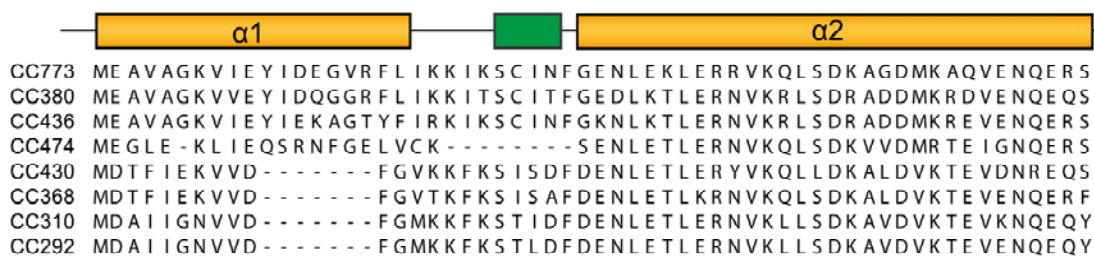

**Figure 3**

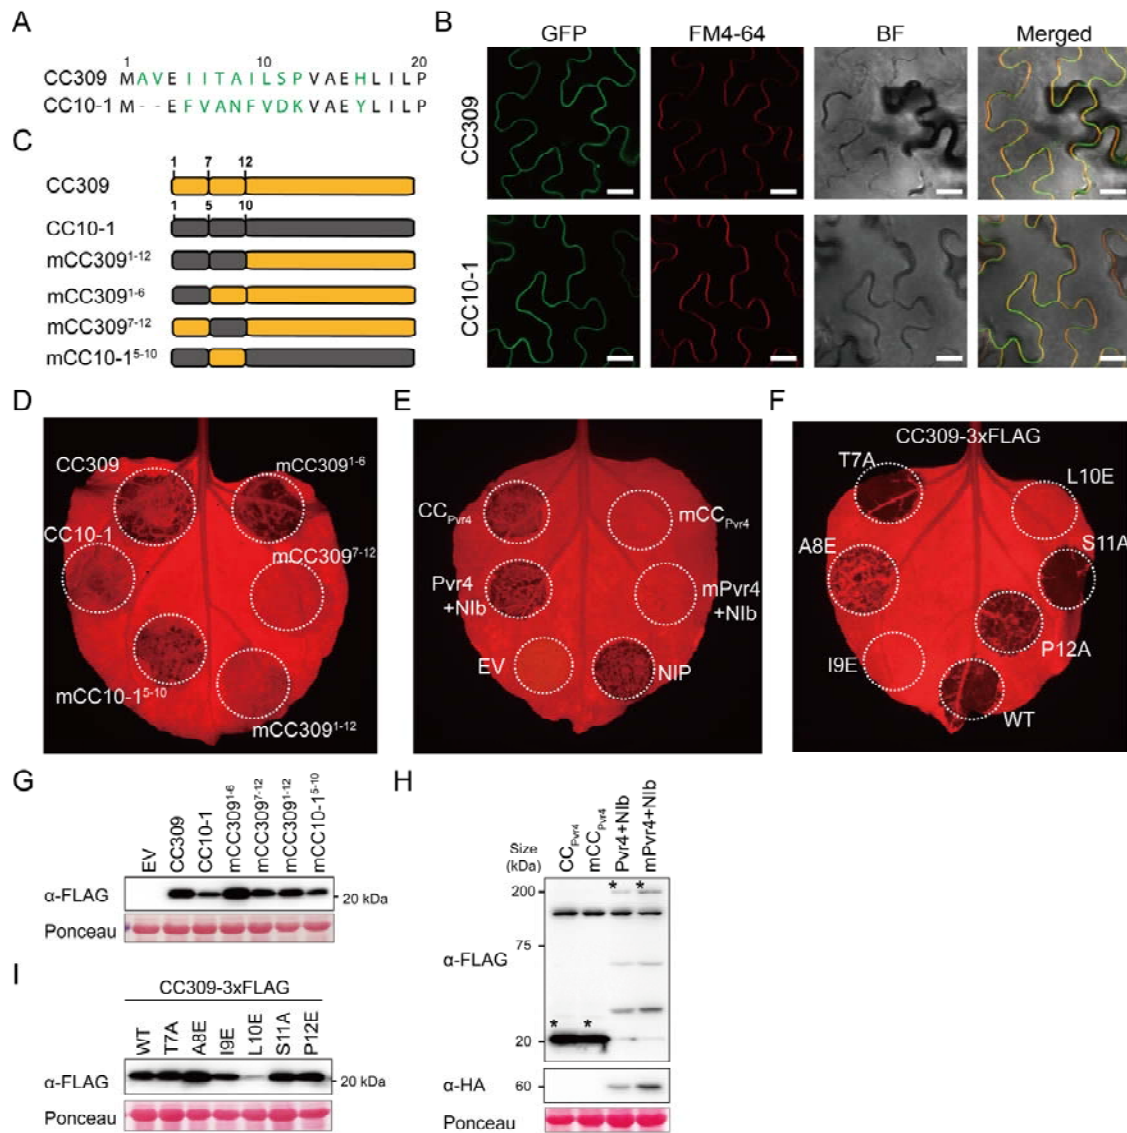

**Figure 4**

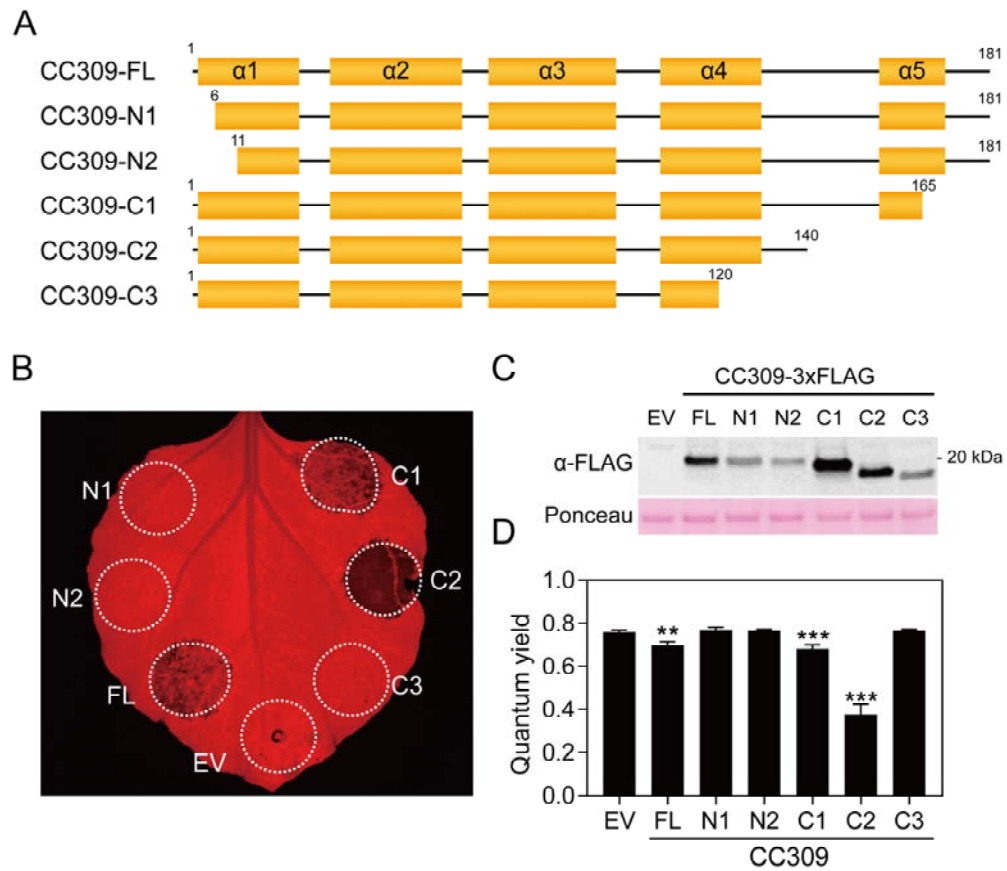

**Figure 5**

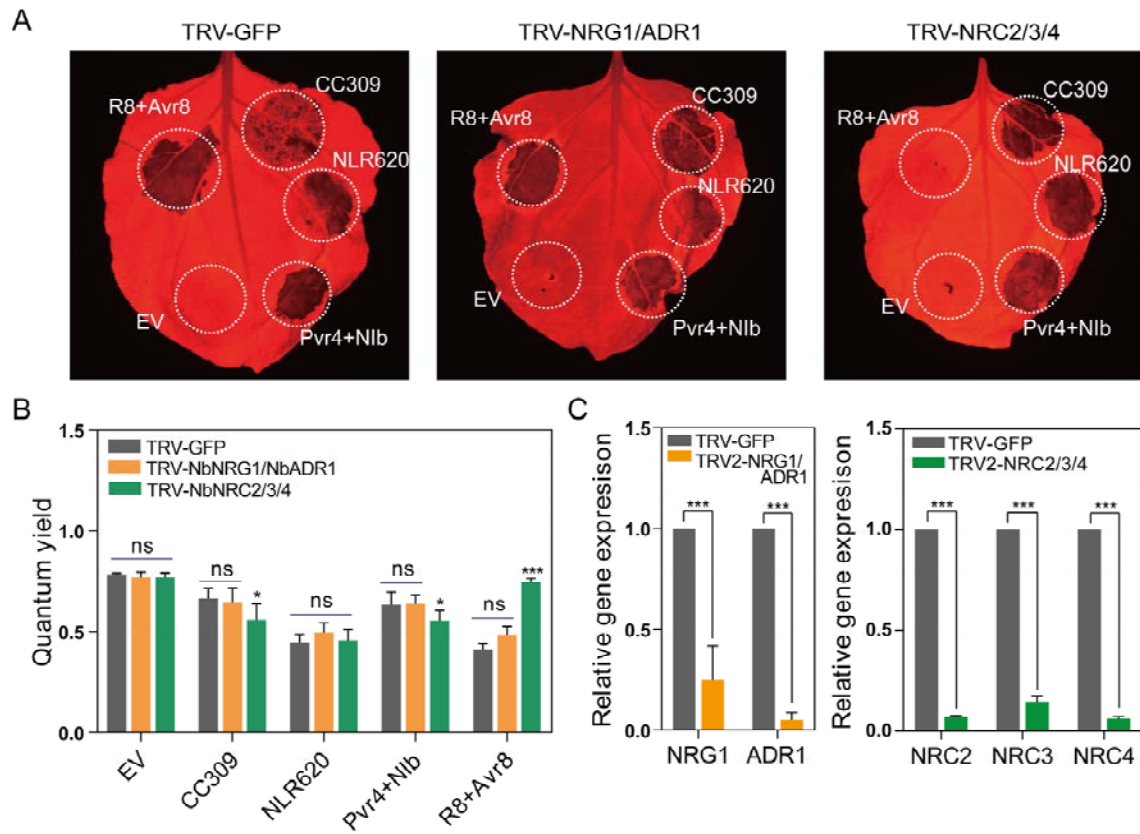

**Figure 6**

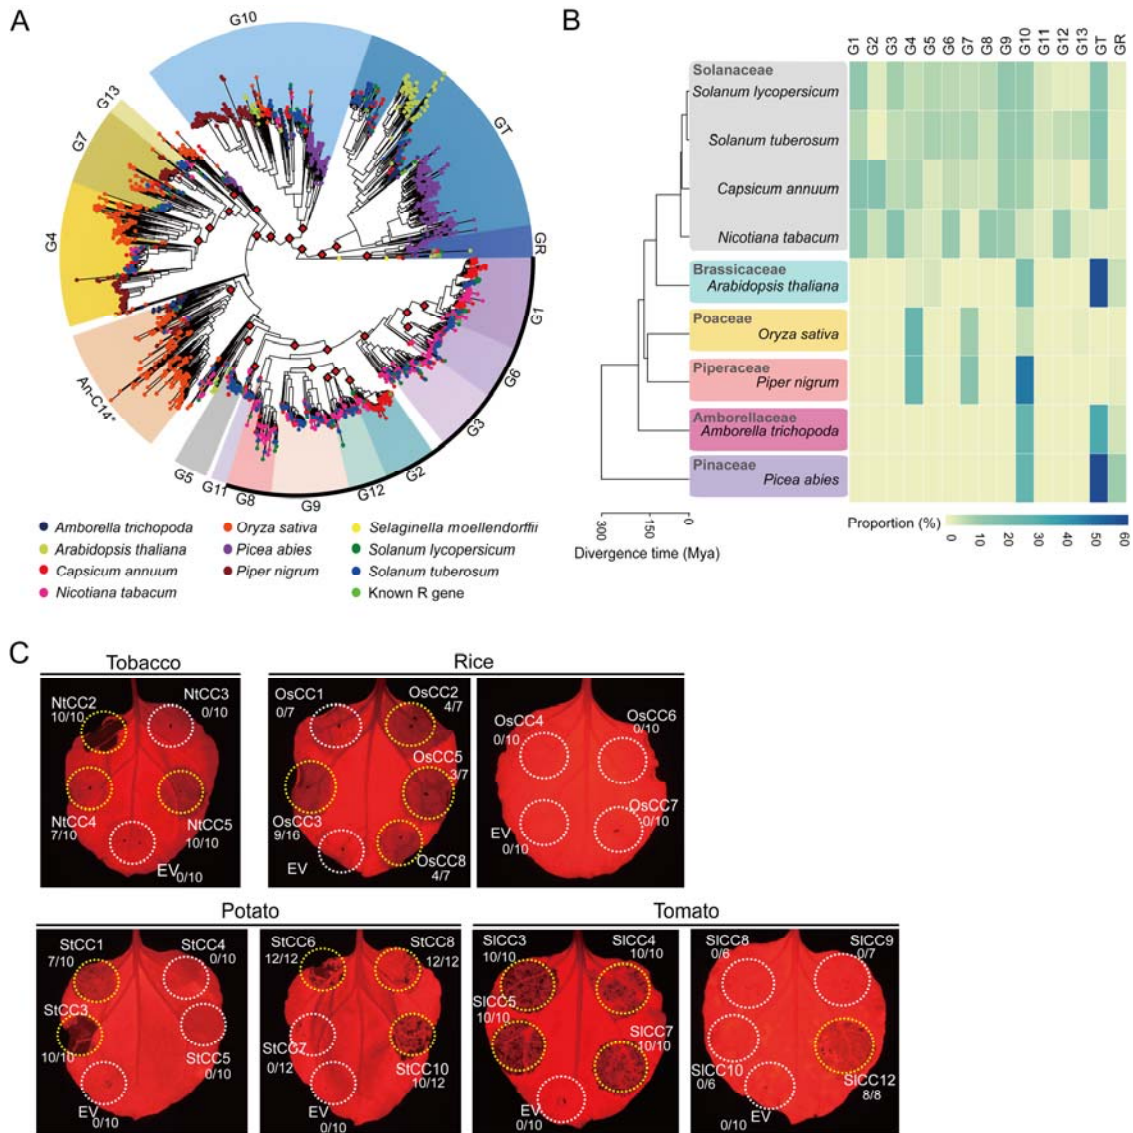

Source: https://www.biorxiv.org/content/10.1101/2019.12.16.878959v2.full.pdf
